# Supplementary material
Source: Springer Nature journal article supplement (https://www.springermedizin.de/resource/supplementary/13054_2006_4449_MOESM4_ESM.pdf/9722966)

Fig. 3

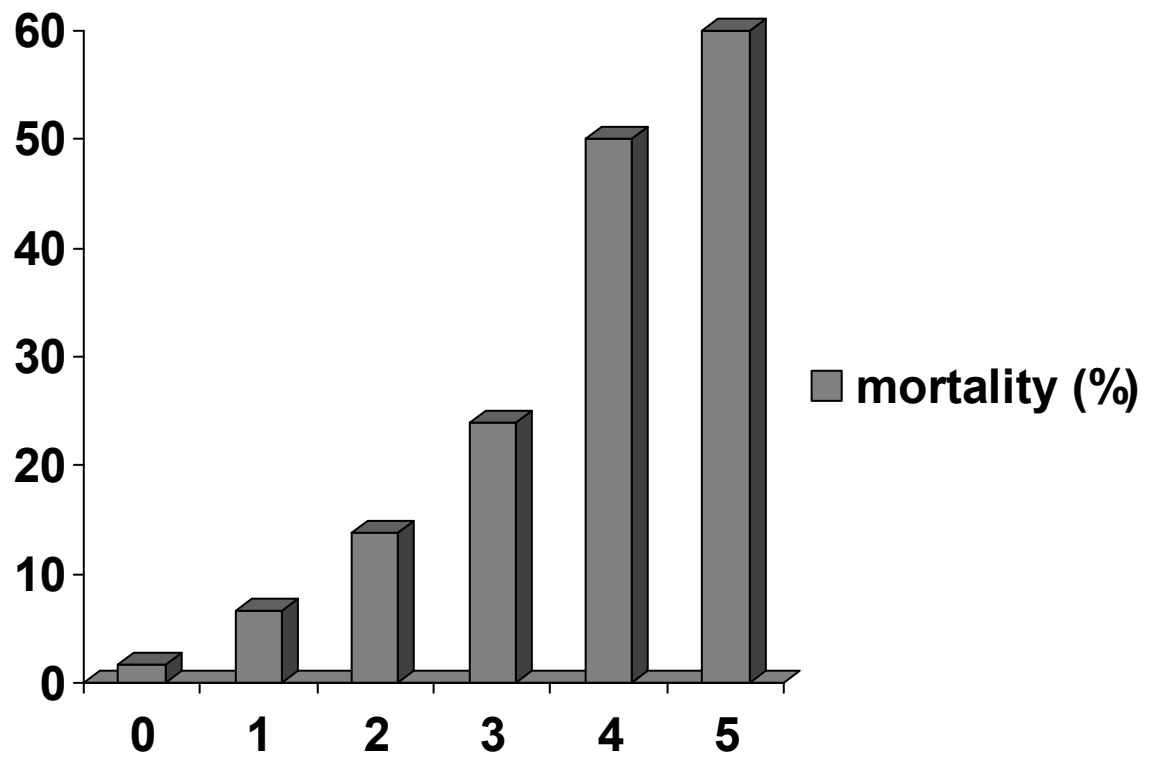

Supplement: MOESM4 [file 9722966]
